# Supplementary material for: β-Cyclodextrin supported MoO3–CeO2nanocomposite material as an efficient heterogeneous catalyst for degradation of phenol
Source: Royal Society of Chemistry journal article supplement (doi:10.1039/c5ra25966e), 2016-01-01
Supplement: c5ra25966e1.pdf [file c5ra25966e1.pdf]

## **Electronic Supplementary Information**

**Manuscript RA-ART-12-2015-025966**

### **$\beta$ -Cyclodextrin Supported MoO<sub>3</sub>-CeO<sub>2</sub> Nanocomposite Material as Efficient Heterogeneous Catalyst for Degradation of Phenol**

**Madhukar E. Navgire<sup>a</sup>, Parikshit Gogoi<sup>b</sup>, Baithy Mallesham<sup>c</sup>, Agolu Rangaswami<sup>c</sup>,  
Benjaram M. Reddy<sup>\*,c</sup>, Machhindra K. Lande<sup>d</sup>**

*<sup>a</sup> Post Graduate Department of Chemistry, Jijamata College of Science and Arts Bhende, Maharashtra, India*

*<sup>b</sup> Department of Chemistry, Nowgong College, Nagaon, Assam, India*

*<sup>c</sup> Inorganic and Physical Chemistry Division, CSIR-Indian Institute of Chemical Technology, Uppal Road, Hyderabad, India*

*<sup>d</sup> Department of Chemistry, Dr. B. A. M. University, Aurangabad, India*

#### **Submitted to RSC Advances**

-----  
\*Author to whom correspondence should be addressed.

**Benjaram M. Reddy<sup>\*,c</sup>** Phone: +914027193510. Fax: +914027160921. E-mail:  
bmreddy@iict.res.in; mreddyb@yahoo.com

**Madhukar E. Navgire<sup>\*,a</sup>** Phone: +912427255304. Fax: +912427255304. E-mail:  
navgireme@yahoo.co.in;

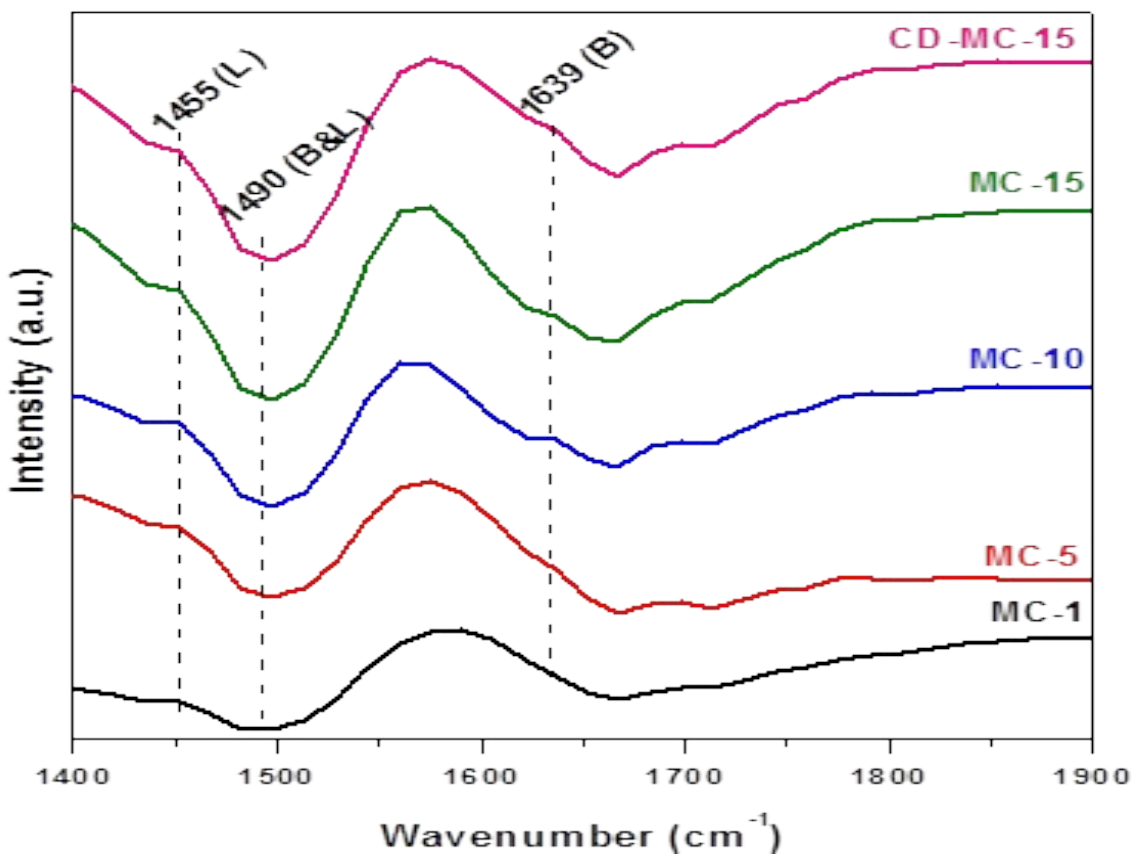

**Figure S1.** Pyridine adsorption FT-IR spectra of the MC-1, MC-5, MC-10, MC-15 and CD-MC-15 catalysts. B- Brønsted; and L- Lewis acidic sites.

**Table S1** Elemental quantitative detailed analysis of MC-15 and CD-MC-15 catalyst.

| Elements     | MC -15     |            | CD-MC-15   |            |
|--------------|------------|------------|------------|------------|
|              | Weight %   | Atomic %   | Weight %   | Atomic %   |
| C K          | 00         | 00         | 38.09      | 56.76      |
| O K          | 41.11      | 83.70      | 34.94      | 39.09      |
| Mo K         | 24.43      | 08.29      | 11.90      | 02.22      |
| Ce K         | 34.46      | 08.01      | 15.06      | 1.92       |
| <b>Total</b> | <b>100</b> | <b>100</b> | <b>100</b> | <b>100</b> |
